# Supplementary material
Source: HighWire-hosted journal article supplement (https://erj.ersjournals.com/content/56/2/1902202)
Supplement: inline-supplementary-material-1 [file inline-supplementary-material-1.pdf]

## **SUPPLEMENTAL MATERIAL**

### **Minimal clinically important differences in average, best, worst and current intensity and unpleasantness of chronic breathlessness**

**Table S1.** Minimal clinically important differences (MCIDs) calculated by anchor-based methods for all participants

**Table S2.** Minimal clinically important differences (MCIDs) in participants with mMRC 3-4

**Table S3.** Relative MCIDs (percentage change from baseline) calculated using two participant anchors

**Table S1.** Minimal clinically important differences (MCIDs) calculated by anchor-based methods for all participants

| Dimension                                                     |                                 | Unpleasantness      | Intensity           |                     |                     |                     |
|---------------------------------------------------------------|---------------------------------|---------------------|---------------------|---------------------|---------------------|---------------------|
| Focal period                                                  |                                 | Current             | Current             | Average             | Best                | Worst               |
| Participant preference question used                          |                                 |                     |                     |                     |                     |                     |
| I have been less breathless during the past week              | Yes (n/N)                       | 119/229             | 121/231             | 124/235             | 123/234             | 124/235             |
|                                                               | Mean Changes from baseline (SD) | -7.3 (26.1)         | -12.7 (23.5)        | -8.1 (18.1)         | -7.3 (19.5)         | -11.9 (27.7)        |
|                                                               | No (n/N)                        | 110/229             | 110/231             | 111/235             | 111/234             | 111/235             |
|                                                               | Mean Change from baseline (SD)  | 3.6 (20.9)          | 1.2 (21.3)          | 1.4 (20.1)          | 5.1 (20.8)          | -1.0 (24.4)         |
|                                                               | MCID (95% CI)                   | -10.9 (-17.1, -4.7) | -13.9 (-19.7, -8.1) | -9.5 (-14.4, -4.6)  | -12.4 (-17.6, -7.2) | -10.9 (-17.6, -4.2) |
| This medication would benefit me enough to be on it long term | Yes (n/N)                       | 111/223             | 112/225             | 113/229             | 112/228             | 113/229             |
|                                                               | Mean Changes from baseline (SD) | -7.3 (23.4)         | -11.0 (22.5)        | -9.6 (18.9)         | -7.7 (19.3)         | -12.9 (26.8)        |
|                                                               | No (n/N)                        | 112/223             | 113/225             | 116/229             | 116/228             | 116/229             |
|                                                               | Mean Changes from baseline (SD) | 2.9 (24.4)          | -1.1 (23.7)         | 1.8 (19.1)          | 4.5 (21.3)          | -1.6 (25.6)         |
|                                                               | MCID (95% CI)                   | -10.2 (-16.5, -3.9) | -9.9 (-16.0, -3.8)  | -11.4 (-16.3, -6.5) | -12.2 (-17.5, -6.9) | -11.3 (-18.1, -4.5) |

**Table S2.** Minimal clinically important differences (MCIDs) in participants with mMRC 3-4

| Dimension                                                            |                                 | Unpleasantness      | Intensity           |                     |                     |                     |
|----------------------------------------------------------------------|---------------------------------|---------------------|---------------------|---------------------|---------------------|---------------------|
| Focal period                                                         |                                 | Current             | Current             | Average             | Best                | Worst               |
| <b>Participant preference question used</b>                          |                                 |                     |                     |                     |                     |                     |
| <b>I have been less breathless during the past week</b>              | Yes (n/N)                       | 109/206             | 111/208             | 114/212             | 113/211             | 114/212             |
|                                                                      | Mean Changes from baseline (SD) | -7.0 (26.3)         | -13.0 (24.0)        | -7.7 (18.0)         | -7.2 (19.6)         | -11.7 (27.7)        |
|                                                                      | No (n/N)                        | 97/206              | 97/208              | 98/212              | 98/211              | 98/212              |
|                                                                      | Mean Changes from baseline (SD) | 3.7 (20.7)          | 1.5 (22.2)          | 1.0 (20.9)          | 5.5 (21.3)          | -0.6 (24.5)         |
|                                                                      | MCID (95% CI)                   | -10.7 (-17.3, -4.1) | -14.5 (-20.9, -8.1) | -8.7 (-14.0, -3.4)  | -12.7 (-18.3, -7.1) | -11.1 (-18.2, -4.0) |
| <b>This medication would benefit me enough to be on it long term</b> | Yes (n/N)                       | 103/200             | 104/202             | 105/206             | 104/205             | 105/206             |
|                                                                      | Mean Changes from baseline (SD) | -7.0 (23.3)         | -10.8 (22.9)        | -9.3 (19.0)         | -7.8 (19.4)         | -12.7 (27.2)        |
|                                                                      | No (n/N)                        | 97/200              | 98/202              | 101/206             | 101/205             | 101/206             |
|                                                                      | Mean Changes from baseline (SD) | 3.1 (24.8)          | -1.3 (25.0)         | 1.6 (19.7)          | 5.2 (21.8)          | -1.3 (25.3)         |
|                                                                      | MCID (95% CI)                   | -10.1 (-16.8, -3.4) | -9.5 (-16.1, -2.9)  | -10.9 (-16.2, -5.6) | -13.0 (-18.7, -7.3) | -11.4 (-18.6, -4.2) |

MCIDs were calculated using two participant anchors (questions).

**Table S3.** Relative MCIDs (percentage change from baseline) calculated using two participant anchors

| Dimension                                                            |                                         | Unpleasantness         | Intensity               |                         |                          |                        |
|----------------------------------------------------------------------|-----------------------------------------|------------------------|-------------------------|-------------------------|--------------------------|------------------------|
| Focal period                                                         |                                         | Current                | Current                 | Average                 | Best                     | Worst                  |
| <b>Participant preference question used</b>                          |                                         |                        |                         |                         |                          |                        |
| <b>I have been less breathless during the past week</b>              | Yes (n/N)                               | 118/225                | 121/229                 | 123/233                 | 123/228                  | 124/233                |
|                                                                      | Relative Changes from baseline (95% CI) | 26.9% (-13.8%, 67.8%)  | -17.2% (-28.3%, -6.1%)  | -7.8% (-23.3%, 7.7%)    | 16.9% (-11.8%, 45.6%)    | 2.5% (-21.0%, 26.0%)   |
|                                                                      | No (n/N)                                | 107/225                | 108/229                 | 109/233                 | 105/228                  | 109/233                |
|                                                                      | Relative Changes from baseline (95% CI) | 64.1% (23.4%, 104.6%)  | 28.9% (8.3%, 49.5%)     | 33.0% (10.0%, 56.0%)    | 80.4% (39.2%, 121.6%)    | 37.4% (-3.4%, 78.2%)   |
|                                                                      | Relative MCID (95% CI)                  | -37.0% (-94.4%, 20.4%) | -46.1% (-68.7%, -23.5%) | -40.8% (-67.8%, -13.8%) | -63.5% (-112.4%, -14.6%) | -34.9% (-80.4%, 10.6%) |
| <b>This medication would benefit me enough to be on it long term</b> | Yes (n/N)                               | 110/220                | 112/224                 | 112/227                 | 111/223                  | 113/228                |
|                                                                      | Relative Changes from baseline (95% CI) | -14.0% (-39.7%, 11.7%) | -13.8% (-26.7%, -0.8)   | -11.6% (-27.9%, 4.7%)   | 5.2% (-18.9%, 29.3%)     | -1.0% (-25.6%, 23.6%)  |
|                                                                      | No (n/N)                                | 110/220                | 112/224                 | 115/227                 | 112/223                  | 115/228                |
|                                                                      | Relative Changes from baseline (95% CI) | 76.1% (23.5%, 128.5%)  | 23.5% (4.0%, 43.0%)     | 29.5% (4.0%, 55.0%)     | 78.7% (39.3%, 118.0%)    | 25.9% (-5.3%, 57.1%)   |
|                                                                      | Relative MCID (95% CI)                  | -90% (-148.1%, -31.8%) | -37.3% (-60.5%, -14.0%) | -41.1% (-71.4%, -10.8%) | -73.5% (-119.4%, -27.6%) | -26.9% (-66.5%, 12.7%) |

The relative MCID was defined as the change in the score divided by the score at baseline.

*Abbreviations:* MCID, minimal clinically important difference.
